# Supplementary material for: Repeated clinical malaria episodes are associated with modification of the immune system in children
Source: PubMed Central journal article supplement (PMC6415347; doi:10.1186/s12916-019-1292-y), 2019-03-13

# Supplementary Figure S6

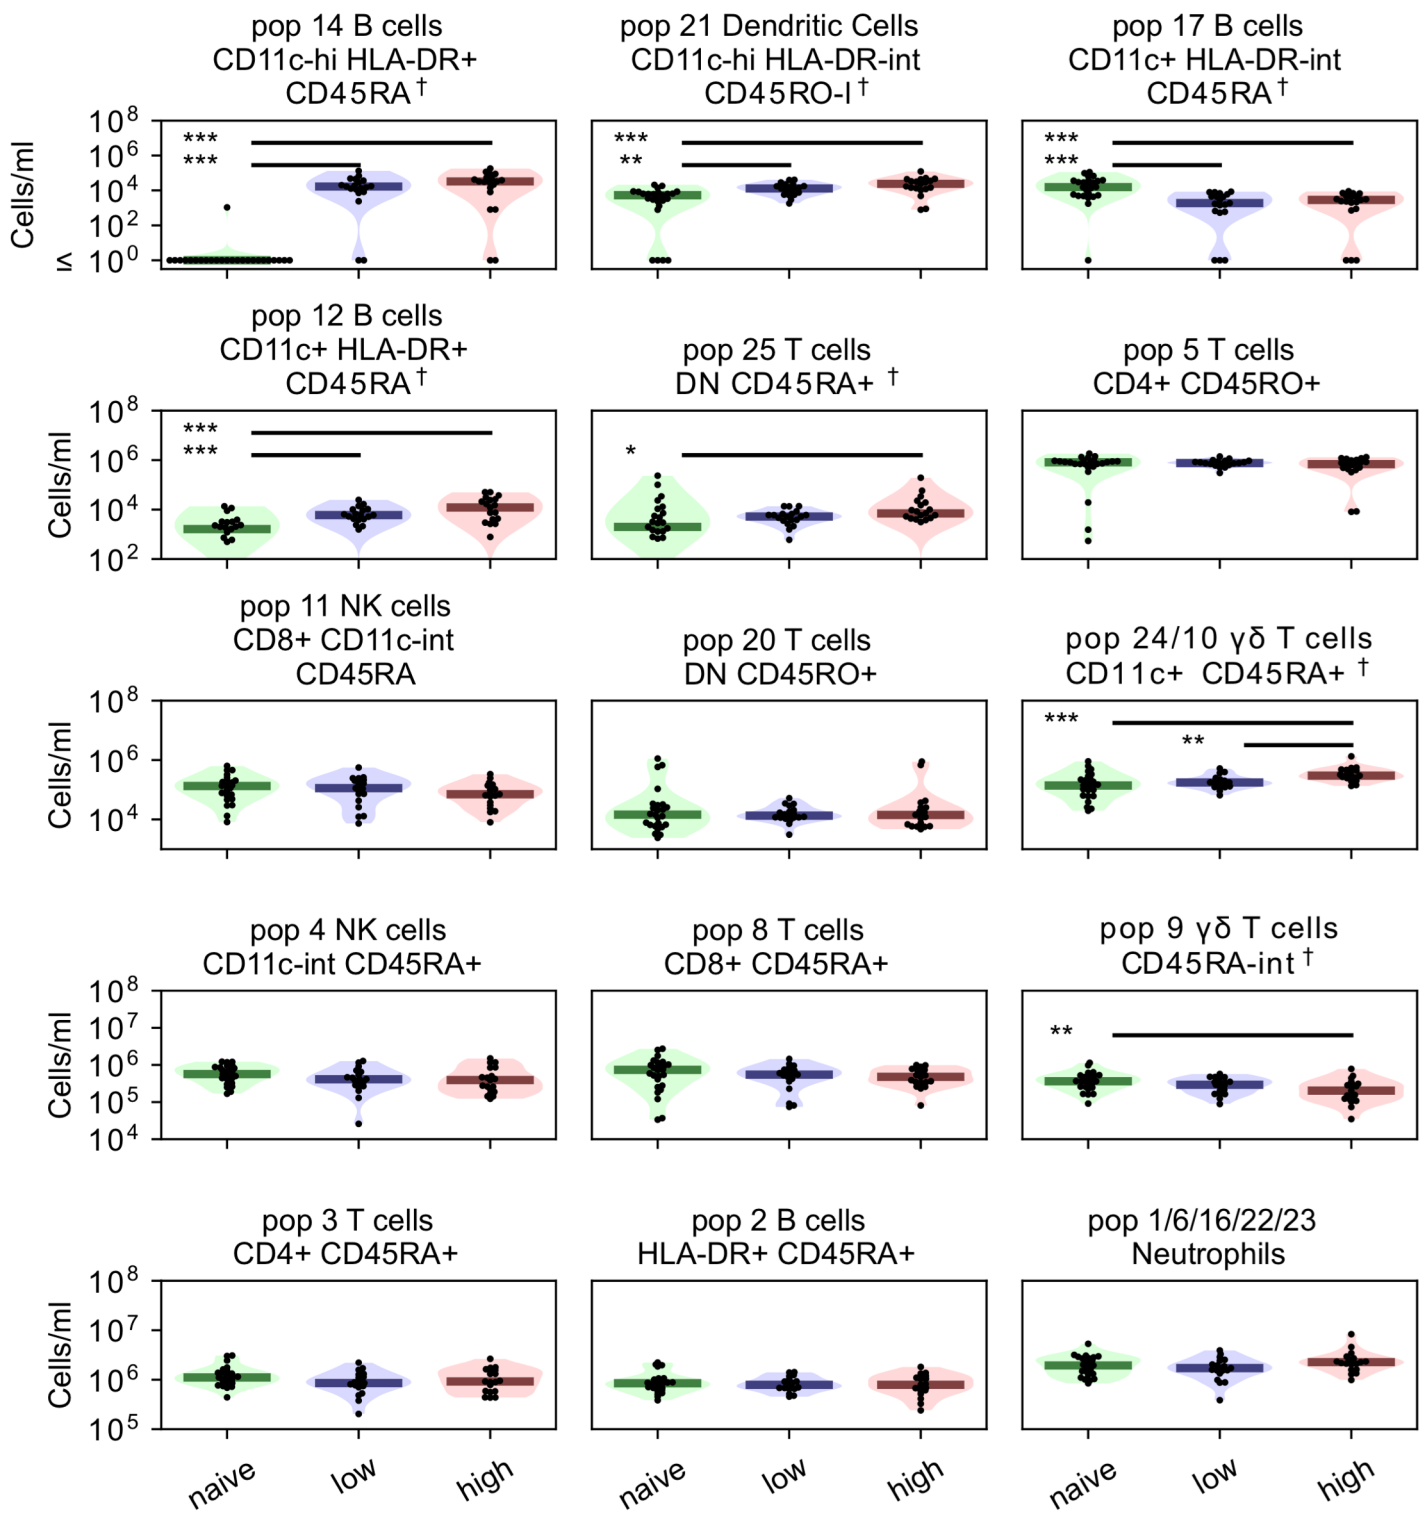

Supplement: 12916_2019_1292_MOESM9_ESM.pdf [file 12916_2019_1292_MOESM9_ESM.pdf]
